# Supplementary material for: A two-dimensional Te/ReS2 van der Waals heterostructure photodetector with high photoresponsivity and fast photoresponse
Source: Royal Society of Chemistry journal article supplement (doi:10.1039/d2nr07185a), 2023-01-01
Supplement: d2nr07185a1.pdf [file d2nr07185a1.pdf]

## Supporting Information

# Two-dimensional Te/ReS<sub>2</sub> van der Waals heterostructure photodetector with high photoresponsivity and fast photoresponse

Yafei Yan<sup>a,‡</sup>, Minxin Li<sup>a,‡</sup>, Kai Xia<sup>b,c,‡</sup>, Kemeng Yang<sup>a</sup>, Dun Wu<sup>a</sup>, Liang Li<sup>a,c</sup>, Guangtao Fei<sup>c\*</sup>, and Wei Gan<sup>a\*</sup>

Yafei Yan, Minxin Li, Kemeng Yang, Dun Wu, Liang Li, Wei Gan

<sup>a</sup>Institute of Physical Science and Information Technology and Information Materials and Intelligent Sensing Laboratory of Anhui Province, Anhui University, Hefei 230601, China.

Email: ganw@ahu.edu.cn

Kai Xia

<sup>b</sup>University of Science and Technology of China, Hefei 230026, P. R. China.

Kai Xia, Li Liang, Guangtao Fei

<sup>c</sup>Key Laboratory of Materials Physics and Anhui Key Laboratory of Nanomaterials and Nanotechnology, Institute of Solid State Physics, Hefei Institutes of Physical Science, Chinese Academy of Sciences, Hefei 230031, P. R. China.

<sup>‡</sup>These authors contributed equally to this work.

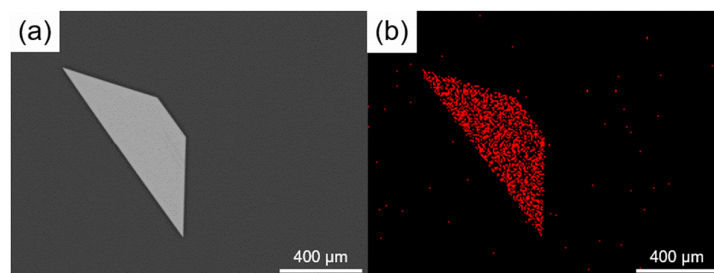

**Figure S1** Basic characterization of 2D Te. (a) SEM image of synthesized 2D Te. (b) The corresponding EDS spectra of 2D Te shown in (a).

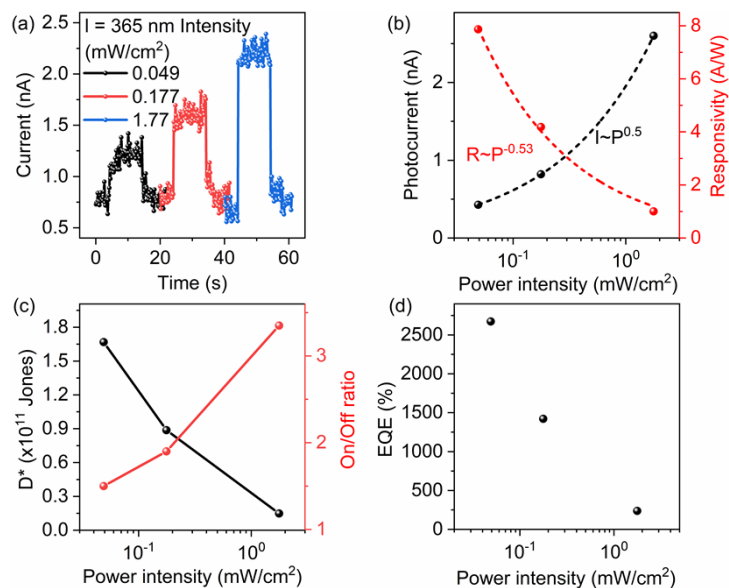

**Figure S2** Photoresponse characteristics of the Te/ReS<sub>2</sub> vdWH device illuminated by 365 nm laser at a bias voltage of -1 V. (a) Time dependent photoresponse curves of the Te/ReS<sub>2</sub> vdWH device under different laser powers. (b) Photocurrent and responsivity of the device under different power intensities. (c) Specific detectivity ( $D^*$ ) and photoresponse on/off ratio of the device. (d) External quantum efficiency (EQE) of the device under various laser intensities.

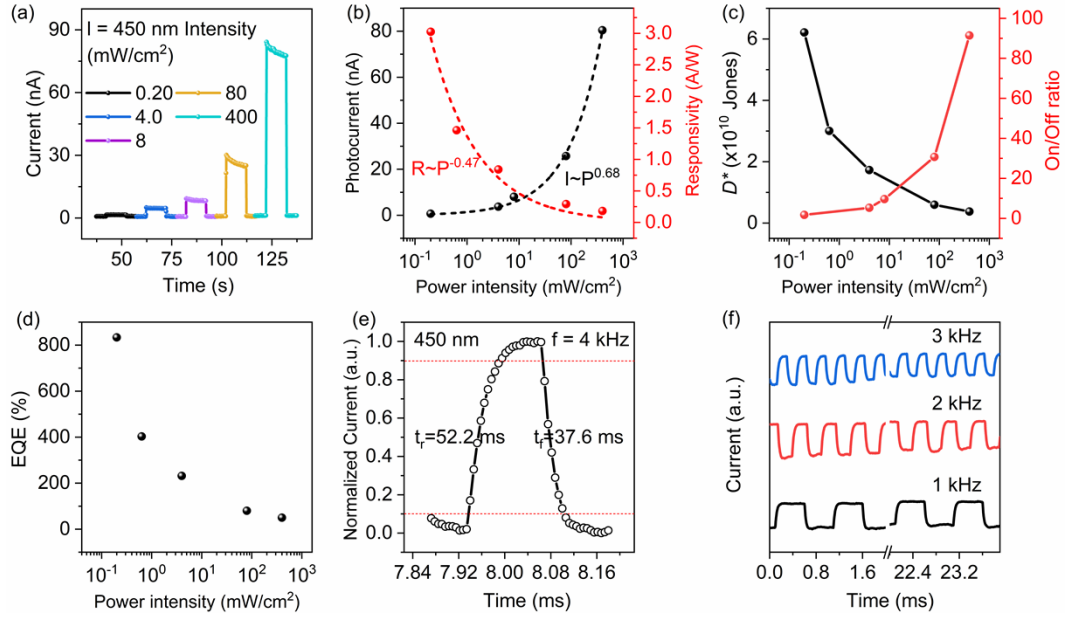

**Figure S3** Photoresponse characteristics of Te/ReS<sub>2</sub> vdWH device under a 450 nm illumination at a bias voltage of -1 V. (a) Time dependent photoresponse curves of the Te/ReS<sub>2</sub> vdWH device under different laser powers. (b) Photocurrent and responsivity of the device under different power intensities. (c) Specific detectivity ( $D^*$ ) and photoresponse on/off ratio of the device. (d) External quantum efficiency (EQE) of the device under various laser intensities. (e) Rise and decay time of the device under 4 kHz frequency. (f) Time dependent photocurrent of the device at various frequencies of the incident laser.

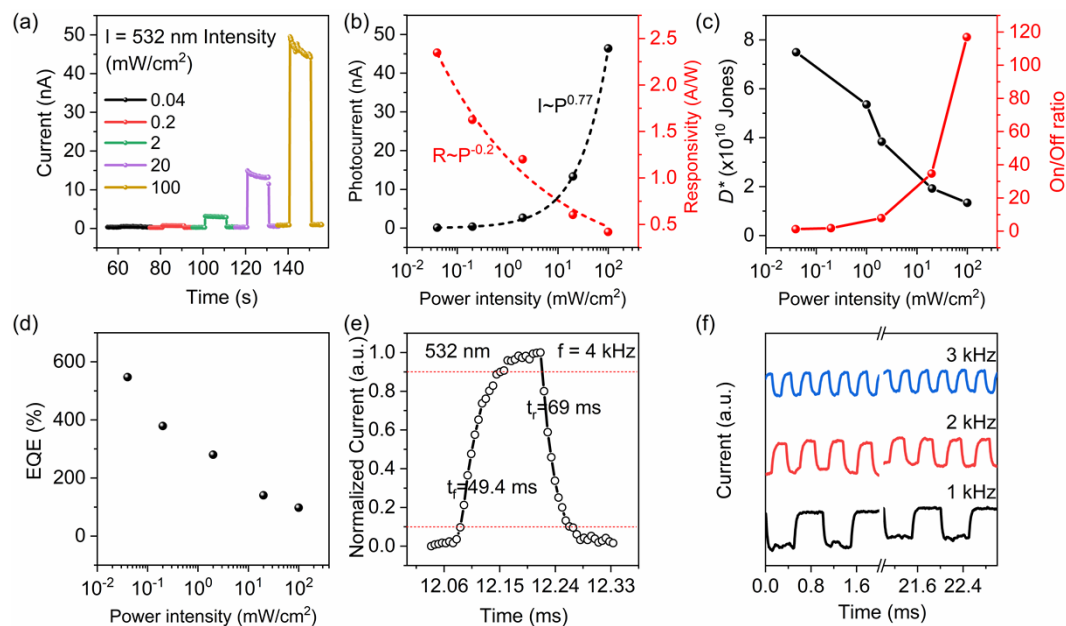

**Figure S4** Photoresponse characteristics of Te/ReS<sub>2</sub> vdWH device under a 532 nm illumination at a bias voltage of -1 V. (a) Time dependent photoresponse curves of the Te/ReS<sub>2</sub> vdWH device under different laser powers. (b) Photocurrent and responsivity of the device under different power intensities. (c) Specific detectivity ( $D^*$ ) and photoresponse on/off ratio of the device. (d) External quantum efficiency (EQE) of the device under various laser intensities. (e) Rise and decay time of the device under 4 kHz frequency. (f) Time dependent photocurrent of the device at various frequencies of the incident laser.

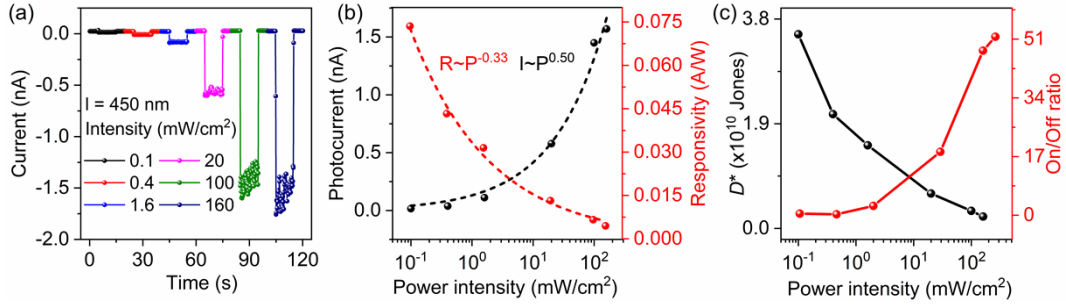

**Figure S5** Photoresponse characteristics of the Te/ReS<sub>2</sub> vdWH device illuminated by 450 nm laser at 0 V bias voltage. (a) Time dependent photocurrents of the device under various incident light intensities. (b-c) Photocurrent, responsivity,  $D^*$  and on/off ratio of the device under various incident light intensities.

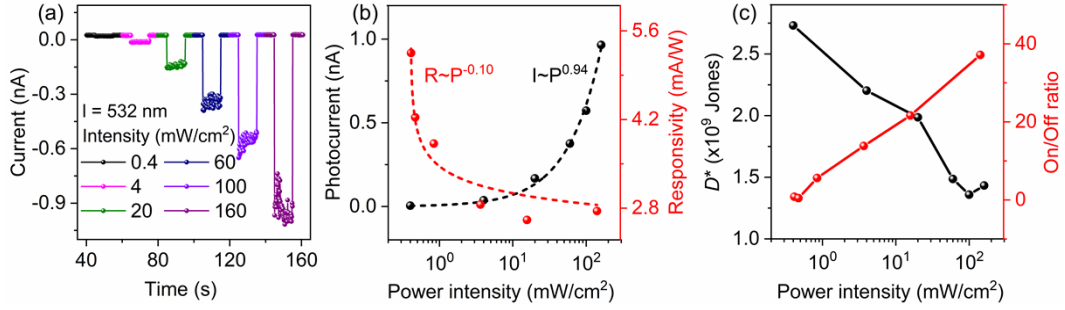

**Figure S6** Photoresponse characteristics of the Te/ReS<sub>2</sub> vdWH device illuminated by 532 nm laser at 0 V bias voltage. (a) Time dependent photocurrents of the device under various incident light intensities. (b-c) Photocurrent, responsivity,  $D^*$  and on/off ratio of the device under various incident light intensities.
